# Supplementary material
Source: ML conference proceedings conference paper supplement (https://proceedings.neurips.cc/paper_files/paper/2019/hash/09a8a8976abcdfdee15128b4cc02f33a-Abstract.html)
Supplement: Supplementary file 1 [file 09a8a8976abcdfdee15128b4cc02f33a-Supplemental.zip]

Archive with 1 entries (1 files):
- Supp.pdf
